# Supplementary material
Source: PubMed Central journal article supplement (PMC9832135)
Supplement: mmc1.pdf [file mmc1.pdf]

# C-IMMSIM simulation results

November 20, 2022

## **Abstract**

This document includes the plots relative to the simulation and the outcome of the epitope/peptide prediction used.

Produced by the C-IMMSIM Online server available at <http://kraken.iac.rm.cnr.it/C-IMMSIM>

CITATIONS: For publication of results, please cite:

Nicolas Rapin, Ole Lund, Massimo Bernaschi, Filippo Castiglione. Computational Immunology Meets Bioinformatics: The Use of Prediction Tools for Molecular Binding in the Simulation of the Immune System. PLoS ONE 5(4): e9862. doi:10.1371/journal.pone.0009862, 2010.

Original C-IMMSIM model: [www.iac.cnr.it/~filippo/c-immsim](http://www.iac.cnr.it/~filippo/c-immsim)

GETTING HELP: Scientific problems: Filippo Castiglione (f dot castiglione at iac dot cnr dot it) Technical problems: Ilaria Gonnella (ilaria dot gonnella at cnr dot it)

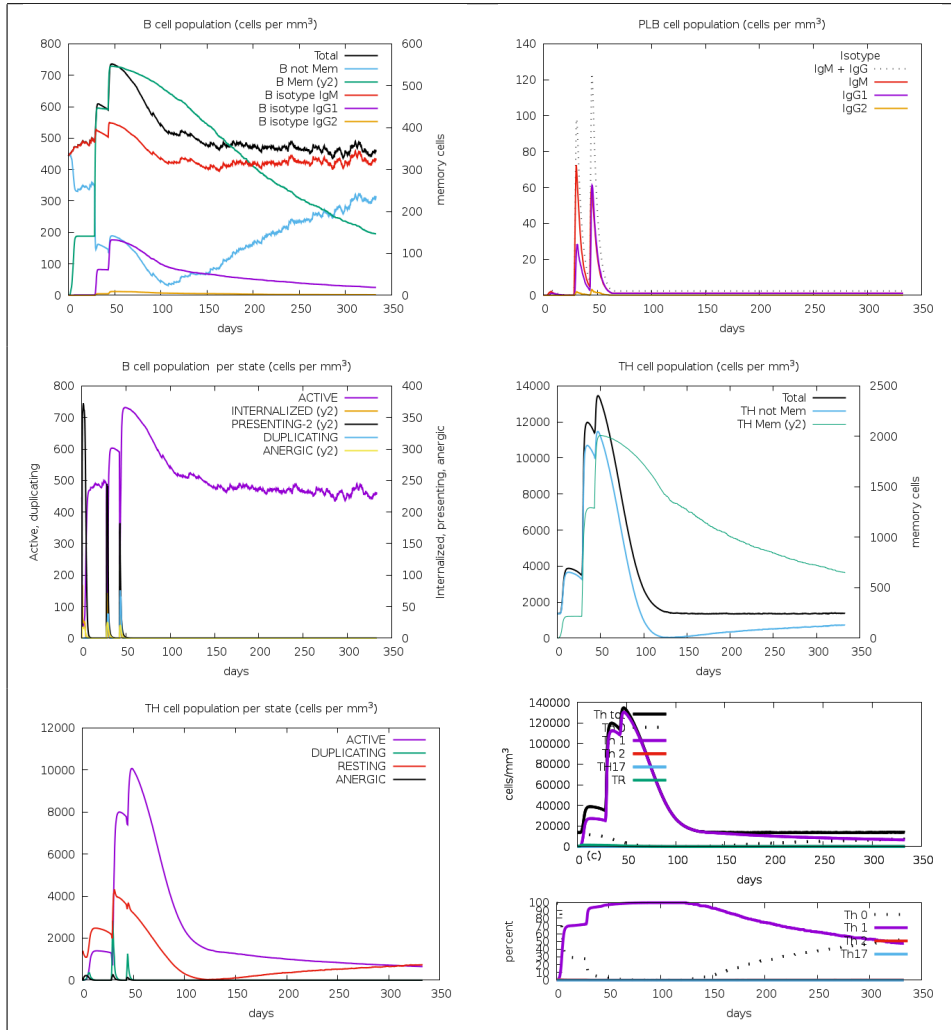

Figure 1: Cell counts shown. Legend: Act=active, Intern=internalized the Ag, Pres II = presenting on MHC II, Dup = in the mitotic cycle, Anergic = anergic, Resting = not active.

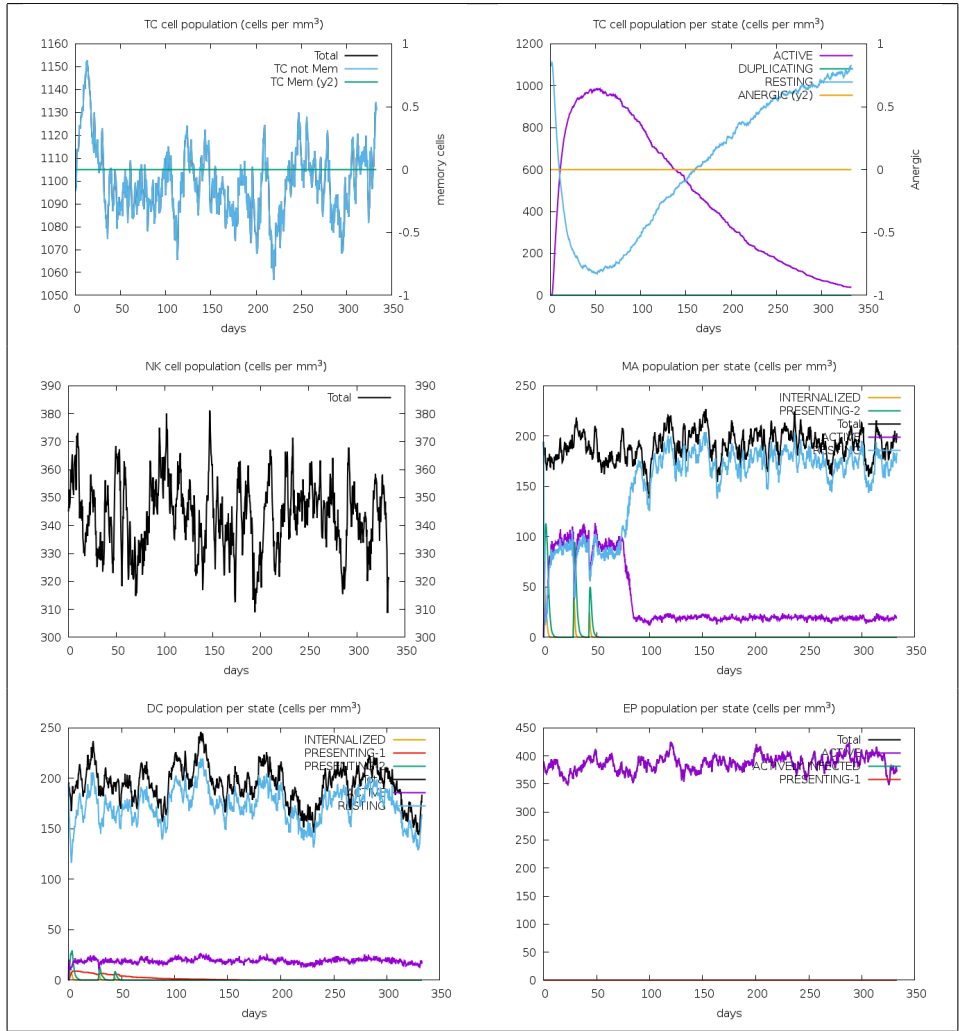

Figure 2: Legend: symbols as figure above.

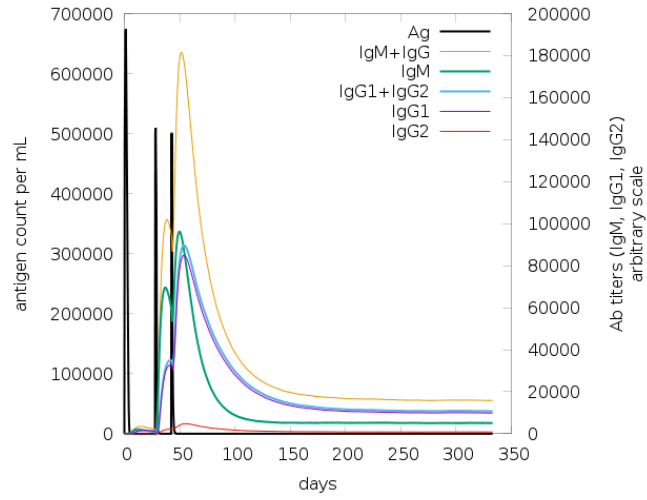

Figure 3: The virus, the immunoglobulins and the immunocomplexes.

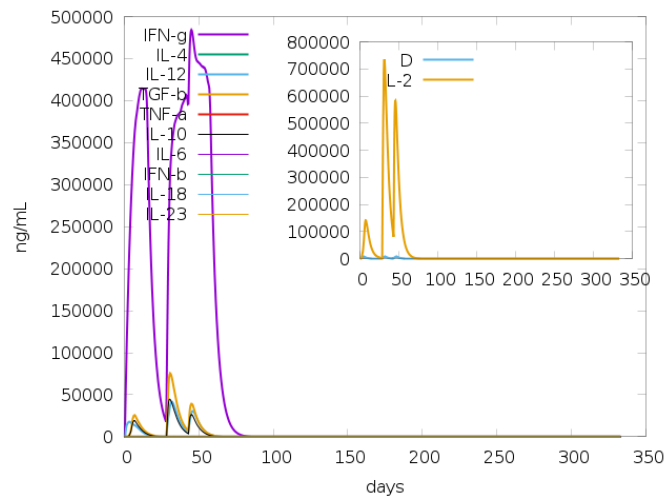

Figure 4: Concentration of cytokines and interleukins. Inset plot shows danger signal together with leukocyte growth factor IL-2.



Threshold: 9.523800  
Max score: 27.437000

-----  
Antigen sequence file: /opt/lampp/htdocs/C-IMMSIM/Jobs/input/6827\_20221120-033933\_5\_F2TRTG0UfqFj.FSA\_1\_001  
-----

APPHALSEAAKAGLFQRHGEGTKATVGEVVAAYFPRGQGVPIAAYLSYFIASFRAAYRLFRKSNLKAAYGELFWTVVPY  
AAYAGLRPTFDTRAAYLTDRDIVIKGPGGGTWTLYTGAIKLDKGGPGGITRFQTLALHRSYLGPGGSLLENKSLT  
ILDDNGPGPKDCDPVFAEYFVSVLKKTRRIRGGDGKMKDLSPKKYACWHHSIGFDYVYNPKKTSNCTRITTSVAVGDVHPG  
EPVKKYSDICSKHMDARYCSEFIRIKKSFKFRPGSLIYYQNEVTPEYEAANKFNFTVSFVLRVVKVSASHLEHHHHHH

Epitopes of protein 0 -----  
0] pos= 4 score=0.005518 unnormalised=0.5982000000 ALSEAAKA  
1] pos= 274 score=0.027479 unnormalised=2.9792000000 SLIYYQNEV  
2] pos= -1 score=0.967004 unnormalised=104.8410000000 non-binding event

=====  
Allele: B0702  
Pseudo sequence: KAAREEQIKAQTRE  
Threshold: 8.702800  
Max score: 28.406000

-----  
Antigen sequence file: /opt/lampp/htdocs/C-IMMSIM/Jobs/input/6827\_20221120-033933\_5\_F2TRTG0UfqFj.FSA\_1\_001  
-----

APPHALSEAAKAGLFQRHGEGTKATVGEVVAAYFPRGQGVPIAAYLSYFIASFRAAYRLFRKSNLKAAYGELFWTVVPY  
AAYAGLRPTFDTRAAYLTDRDIVIKGPGGGTWTLYTGAIKLDKGGPGGITRFQTLALHRSYLGPGGSLLENKSLT  
ILDDNGPGPKDCDPVFAEYFVSVLKKTRRIRGGDGKMKDLSPKKYACWHHSIGFDYVYNPKKTSNCTRITTSVAVGDVHPG  
EPVKKYSDICSKHMDARYCSEFIRIKKSFKFRPGSLIYYQNEVTPEYEAANKFNFTVSFVLRVVKVSASHLEHHHHHH

Epitopes of protein 0 -----  
0] pos= 0 score=0.016572 unnormalised=2.1552000000 APPHALSEA  
1] pos= 34 score=0.064939 unnormalised=8.4452000000 FPRGQGVPI  
2] pos= 77 score=0.022570 unnormalised=2.9352000000 VPYAAAYAGL  
3] pos= 86 score=0.050660 unnormalised=6.5882000000 RPTFDTRAA  
4] pos= 105 score=0.009314 unnormalised=1.2112000000 GPGPGGTWL  
5] pos= 145 score=0.008037 unnormalised=1.0452000000 GPGPGSLLL  
6] pos= 303 score=0.021732 unnormalised=2.8262000000 VPKVSASHL  
7] pos= -1 score=0.806175 unnormalised=104.8410000000 non-binding event

=====  
Allele: B0801  
Pseudo sequence: KAAREEQIKAQTRE  
Threshold: 8.405400  
Max score: 30.890000

-----  
Antigen sequence file: /opt/lampp/htdocs/C-IMMSIM/Jobs/input/6827\_20221120-033933\_5\_F2TRTG0UfqFj.FSA\_1\_001  
-----

APPHALSEAAKAGLFQRHGEGTKATVGEVVAAYFPRGQGVPIAAYLSYFIASFRAAYRLFRKSNLKAAYGELFWTVVPY  
AAYAGLRPTFDTRAAYLTDRDIVIKGPGGGTWTLYTGAIKLDKGGPGGITRFQTLALHRSYLGPGGSLLENKSLT  
ILDDNGPGPKDCDPVFAEYFVSVLKKTRRIRGGDGKMKDLSPKKYACWHHSIGFDYVYNPKKTSNCTRITTSVAVGDVHPG  
EPVKKYSDICSKHMDARYCSEFIRIKKSFKFRPGSLIYYQNEVTPEYEAANKFNFTVSFVLRVVKVSASHLEHHHHHH

Epitopes of protein 0 -----  
0] pos= 57 score=0.006614 unnormalised=0.7446000000 YRLFRKSNL  
1] pos= 136 score=0.021120 unnormalised=2.3776000000 LLALHRSYL

```

2]      pos= 176 score=0.001746 unnormalised=0.1966000000      FRAEYFSVL
3]      pos= 267 score=0.039206 unnormalised=4.4136000000      SFKFRPGSL
4]      pos=  -1 score=0.931312 unnormalised=104.8410000000      non-binding event

```

DoPeptideList\_II:

Given the antigen injected creates the list of peptides for all the  
NumAgProts proteins and for all i.e., 2 MHCII molecules

Read class II peptide list from file? NO

```

=====
Allele: DRB1_0101
Pseudo sequence: KFAHVEQRKAQTRV
Threshold: 2.392440
Max score: 26.461000

```

-----  
Antigen sequence file: /opt/lampp/htdocs/C-IMMSIM/Jobs/input/6827\_20221120-033933\_5\_F2TRTGOUfqFj.FSA\_1\_001  
-----

```

APPHALSEAAAKAGLFQRHGEGTKATVGEVVAAYFPRGQGVPIAAYLSYFIASFRAAYRFRKSNLKAAYGELFWTVVVPY
AAYAGLRPTFDTRAAYLTDRDIVIKGPGGWTWLTGTGAIKLDKGGPGGITRFQTLALHRSYLGPGPGSLLLENKSLT
ILDDNGPGPKDCDPVFAEYFVSVLKKTRRIRGGDGKMKDLSPKKYACWHHSIGFDYVYNPKKTSNCTRRTTSAVGDVHPG
EPVKKYSDICSKHMDARYCSEFIRIKKSFKFRPGSLIYYQNEVTPEYEAANKFNFTVSFVLRVVKVSASHLEHHHHHH

```

Epitopes of protein 0 -----

```

0]      pos= 34 score=0.003560 unnormalised=0.4135600000      FPRGQGVPI
1]      pos= 42 score=0.010172 unnormalised=1.1815600000      IAAYLSYFI
2]      pos= 65 score=0.011695 unnormalised=1.3585600000      LKAAYGELF
3]      pos= 73 score=0.066576 unnormalised=7.7335600000      FWTVVVPYAA
4]      pos= 82 score=0.022353 unnormalised=2.5965600000      YAGLRPTFD
5]      pos= 89 score=0.042497 unnormalised=4.9365600000      FDTRAAYLT
6]      pos= 113 score=0.022448 unnormalised=2.6075600000      LTYTGAIKL
7]      pos= 130 score=0.001692 unnormalised=0.1965600000      ITRFQTLA
8]      pos= 133 score=0.071810 unnormalised=8.3415600000      FQTLALHR
9]      pos= 137 score=0.038219 unnormalised=4.4395600000      LALHRSYLG
10]     pos= 143 score=0.037556 unnormalised=4.3625600000      YLPGPGSL
11]     pos= 144 score=0.020778 unnormalised=2.4135600000      LGPGPGSLL
12]     pos= 152 score=0.001537 unnormalised=0.1785600000      LLENKSLTI
13]     pos= 268 score=0.062754 unnormalised=7.2895600000      FKFRPGSLI
14]     pos= 300 score=0.016732 unnormalised=1.9435600000      WLRVVKVSA
15]     pos=  -1 score=0.569621 unnormalised=66.1680000000      non-binding event

```

```

=====
Allele: DRB1_1501
Pseudo sequence: RVTLGRDASW
Threshold: 3.125180
Max score: 28.118000

```

-----  
Antigen sequence file: /opt/lampp/htdocs/C-IMMSIM/Jobs/input/6827\_20221120-033933\_5\_F2TRTGOUfqFj.FSA\_1\_001  
-----

```

APPHALSEAAAKAGLFQRHGEGTKATVGEVVAAYFPRGQGVPIAAYLSYFIASFRAAYRFRKSNLKAAYGELFWTVVVPY
AAYAGLRPTFDTRAAYLTDRDIVIKGPGGWTWLTGTGAIKLDKGGPGGITRFQTLALHRSYLGPGPGSLLLENKSLT
ILDDNGPGPKDCDPVFAEYFVSVLKKTRRIRGGDGKMKDLSPKKYACWHHSIGFDYVYNPKKTSNCTRRTTSAVGDVHPG

```

EPVKKYSDICSKHMDARYCSEFIRIKKSFKFRPGSLIYYQNEVTPEYEAANKFNFTVSWFLRVPKVSASHLEHHHHHH

Epitopes of protein 0 -----

|     |          |                |                            |                   |
|-----|----------|----------------|----------------------------|-------------------|
| 0]  | pos= 39  | score=0.001733 | unnormalised=0.2578200000  | GVPIAAYLS         |
| 1]  | pos= 42  | score=0.055646 | unnormalised=8.2788200000  | IAAYLSYFI         |
| 2]  | pos= 46  | score=0.042156 | unnormalised=6.2718200000  | LSYFIASFR         |
| 3]  | pos= 47  | score=0.018046 | unnormalised=2.6848200000  | SYFIASFRA         |
| 4]  | pos= 50  | score=0.063806 | unnormalised=9.4928200000  | IASFRAAYR         |
| 5]  | pos= 54  | score=0.003749 | unnormalised=0.5578200000  | RAAYRLFRK         |
| 6]  | pos= 57  | score=0.014047 | unnormalised=2.0898200000  | YRLFRKSNL         |
| 7]  | pos= 59  | score=0.025567 | unnormalised=3.8038200000  | LFRKSNLKA         |
| 8]  | pos= 76  | score=0.036806 | unnormalised=5.4758200000  | VVPYAAYAG         |
| 9]  | pos= 130 | score=0.074096 | unnormalised=11.0238200000 | ITRFQTLA          |
| 10] | pos= 133 | score=0.037733 | unnormalised=5.6138200000  | FQTLALHR          |
| 11] | pos= 136 | score=0.006727 | unnormalised=1.0008200000  | LLALHRSYL         |
| 12] | pos= 137 | score=0.051909 | unnormalised=7.7228200000  | LALHRSYLG         |
| 13] | pos= 214 | score=0.018853 | unnormalised=2.8048200000  | FDYVYNPKK         |
| 14] | pos= 242 | score=0.014349 | unnormalised=2.1348200000  | VKKYSDICS         |
| 15] | pos= 262 | score=0.025144 | unnormalised=3.7408200000  | IRIKKSFKF         |
| 16] | pos= 275 | score=0.057864 | unnormalised=8.6088200000  | LIYYQNEVT         |
| 17] | pos= 303 | score=0.007023 | unnormalised=1.0448200000  | VPKVSASHL         |
| 18] | pos= -1  | score=0.444747 | unnormalised=66.1680000000 | non-binding event |

---
